# Supplementary material
Source: Springer Nature journal article supplement (https://www.springermedizin.de/resource/supplementary/13014_2007_118_MOESM3_ESM.pdf/9632946)

## Advantages of PET/CT in staging lung cancer

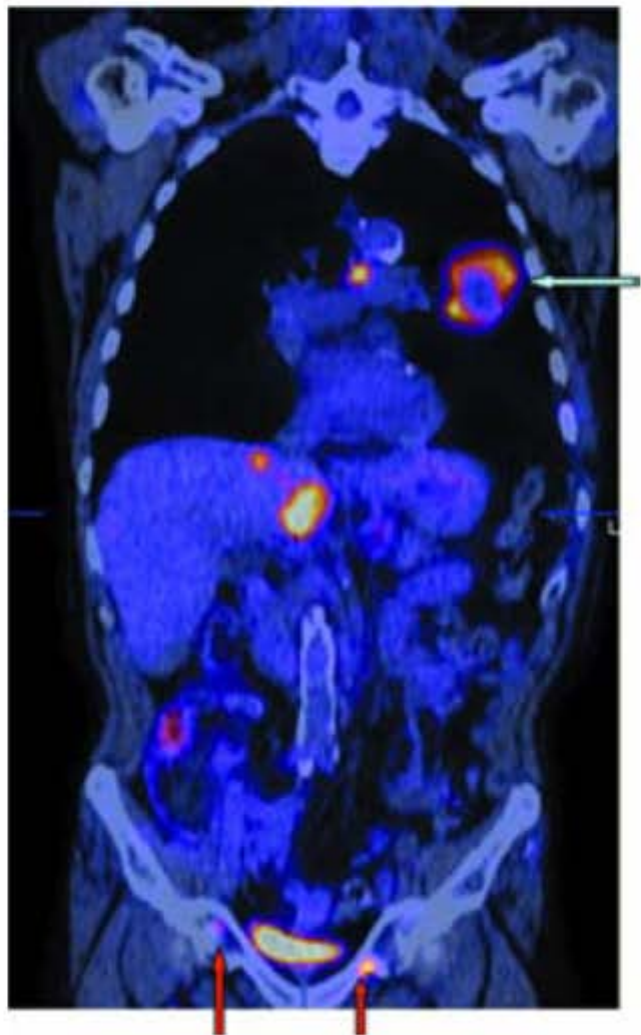

Supplement: MOESM3 [file 9632946]
